# Supplementary material for: Cathodic electrodeposition of zinc–zinc phosphate–calcium phosphate composite coatings on pure iron for biodegradable implant applications
Source: Royal Society of Chemistry journal article supplement (doi:10.1039/d0nj00991a), 2020-01-01
Supplement: d0nj00991a1.pdf [file d0nj00991a1.pdf]

## Supplementary information

### **Cathodic electrodeposition of zinc-zinc phosphate-calcium phosphate composite coatings on pure iron for biodegradable implant applications**

Adhilakshmi A.,<sup>a</sup> Ravichandran K.\*<sup>a</sup> and Sankara Narayanan T.S.N.<sup>b</sup>

*<sup>a</sup>Department of Analytical Chemistry, University of Madras  
Guindy Campus, Chennai-600025, India.*

*<sup>b</sup>Ulsan National Institute of Science and Technology (UNIST)  
Ulsan, Republic of Korea.*

**Table S1: Assignment of FT-IR and Raman bands of zinc - zinc phosphate - calcium phosphate composite coatings deposited on pure iron by CED under varying current densities at 27 °C for 30 min**

| <b>FT-IR bands (cm<sup>-1</sup>)</b> | <b>Assignment</b>                                                                                     | <b>Raman bands (cm<sup>-1</sup>)</b> | <b>Assignment</b>                                                                                     |
|--------------------------------------|-------------------------------------------------------------------------------------------------------|--------------------------------------|-------------------------------------------------------------------------------------------------------|
| 3521                                 | (O-H) stretching of H <sub>2</sub> O                                                                  | 302                                  | M-O bending mode                                                                                      |
| 3189                                 | (O-H) stretching of H <sub>2</sub> O                                                                  | 442                                  | $\nu_2$ bending mode of HPO <sub>4</sub> <sup>2-</sup> and PO <sub>4</sub> <sup>3-</sup>              |
| 1635                                 | H-O-H bending of H <sub>2</sub> O                                                                     | 572                                  | $\nu_4$ bending mode of HPO <sub>4</sub> <sup>2-</sup> and PO <sub>4</sub> <sup>3-</sup>              |
| 1100                                 | $\nu_3$ P-O asymmetric stretching of HPO <sub>4</sub> <sup>2-</sup> and PO <sub>4</sub> <sup>3-</sup> | 808                                  | P-O(H) stretching of HPO <sub>4</sub> <sup>2-</sup>                                                   |
| 1069                                 | $\nu_3$ P-O asymmetric stretching of HPO <sub>4</sub> <sup>2-</sup> and PO <sub>4</sub> <sup>3-</sup> | 986                                  | $\nu_1$ P-O symmetric stretching of PO <sub>4</sub> <sup>3-</sup>                                     |
| 1009                                 | $\nu_3$ P-O asymmetric stretching of HPO <sub>4</sub> <sup>2-</sup> and PO <sub>4</sub> <sup>3-</sup> | 1070                                 | $\nu_3$ P-O asymmetric stretching of HPO <sub>4</sub> <sup>2-</sup> and PO <sub>4</sub> <sup>3-</sup> |
| 929                                  | $\nu_1$ P-O symmetric stretching of HPO <sub>4</sub> <sup>2-</sup>                                    | 1136                                 | $\nu_3$ P-O asymmetric stretching of HPO <sub>4</sub> <sup>2-</sup> and PO <sub>4</sub> <sup>3-</sup> |
| 627                                  | $\nu_L$ liberation of the OH <sup>-</sup> group of H <sub>2</sub> O                                   | 1220                                 | P-O-H in plane bending of HPO <sub>4</sub> <sup>2-</sup>                                              |
| 570                                  | O-P-O(H) bending                                                                                      | 1380                                 | P-O-H in plane bending of HPO <sub>4</sub> <sup>2-</sup>                                              |
|                                      |                                                                                                       | 1626                                 | H-O-H bending of H <sub>2</sub> O                                                                     |
|                                      |                                                                                                       | 1756                                 | H-O-H bending of H <sub>2</sub> O                                                                     |

**Table S2: Assignment of FT-IR and Raman bands of zinc -zinc phosphate - calcium phosphate composite coatings deposited on pure iron by CED at 2 mA/cm<sup>2</sup> at 27 °C for 30 min, after immersion in HBSS at 37 ± 1 °C for 168 h**

| <b>IR bands (cm<sup>-1</sup>)</b> | <b>Assignment</b>                                                                                     | <b>Raman bands (cm<sup>-1</sup>)</b> | <b>Assignment</b>                                                                                     |
|-----------------------------------|-------------------------------------------------------------------------------------------------------|--------------------------------------|-------------------------------------------------------------------------------------------------------|
| 3346                              | (O-H) stretching of H <sub>2</sub> O                                                                  | 310                                  | M-O bending mode                                                                                      |
| 2921                              | (P)O-H stretching                                                                                     | 597                                  | $\nu_4$ bending mode of HPO <sub>4</sub> <sup>2-</sup> and PO <sub>4</sub> <sup>3-</sup>              |
| 2850                              | H-O-H bending and rotation of H <sub>2</sub> O                                                        | 943                                  | $\nu_1$ P-O symmetric stretching of PO <sub>4</sub> <sup>3-</sup>                                     |
| 1747                              | H-O-H bending of H <sub>2</sub> O                                                                     | 997                                  | $\nu_3$ P-O asymmetric stretching of HPO <sub>4</sub> <sup>2-</sup> and PO <sub>4</sub> <sup>3-</sup> |
| 1624                              | H-O-H bending of H <sub>2</sub> O                                                                     | 1057                                 | $\nu_3$ P-O asymmetric stretching of HPO <sub>4</sub> <sup>2-</sup> and PO <sub>4</sub> <sup>3-</sup> |
| 1445                              | $\nu_3$ Asymmetric stretching of CO <sub>3</sub> <sup>2-</sup>                                        | 1154                                 | $\nu_3$ P-O asymmetric stretching of HPO <sub>4</sub> <sup>2-</sup> and PO <sub>4</sub> <sup>3-</sup> |
| 1382                              | P-O-H in-plane bending                                                                                |                                      |                                                                                                       |
| 1192                              | P-O-H in-plane bending                                                                                |                                      |                                                                                                       |
| 1103                              | $\nu_3$ P-O asymmetric stretching of HPO <sub>4</sub> <sup>2-</sup> and PO <sub>4</sub> <sup>3-</sup> |                                      |                                                                                                       |
| 1024                              | $\nu_3$ P-O asymmetric stretching of HPO <sub>4</sub> <sup>2-</sup> and PO <sub>4</sub> <sup>3-</sup> |                                      |                                                                                                       |
| 946                               | $\nu_1$ P-O symmetric stretching of HPO <sub>4</sub> <sup>2-</sup>                                    |                                      |                                                                                                       |

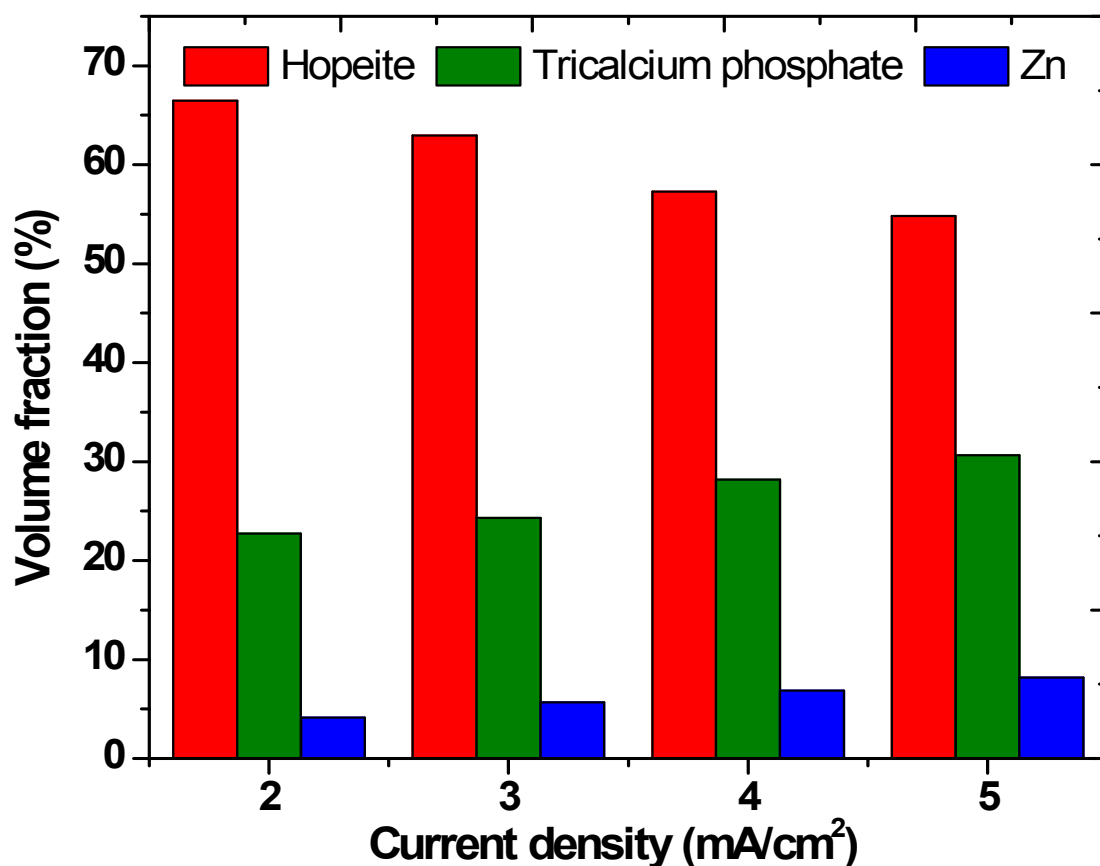

**Fig. S1** Volume fraction of zinc phosphate (hopeite), calcium phosphate and zinc in the composite coatings formed on pure iron by cathodic electrodeposition under varying current densities (2 to 5 mA/cm<sup>2</sup>) at 27 °C for 30 min, estimated from the XRD patterns
